# Supplementary material
Source: Royal Society of Chemistry journal article supplement (doi:10.1039/d6sm00305b)
Supplement: d6sm00305b1.pdf [file d6sm00305b1.pdf]

## *Supporting Information for*

### **Modeling the Slow Arrhenius Process (SAP) in Polymers**

Valeriy V. Ginzburg,<sup>1,\*</sup> Oleg V. Gendelman,<sup>2</sup> Simone Napolitano,<sup>3</sup> Riccardo Casalini,<sup>4</sup>

and Alessio Zaccone<sup>5</sup>

<sup>1</sup>Department of Chemical Engineering and Materials Science, Michigan State University,  
East Lansing, Michigan, USA 48824

<sup>2</sup>Faculty of Mechanical Engineering, Technion, Haifa 3200003, Israel

<sup>3</sup>Laboratory of Polymer and Soft Matter Dynamics, Experimental Soft Matter and Thermal  
Physics (EST), Universite libre de Bruxelles (ULB), Brussels 1050, Belgium

<sup>4</sup>Chemistry Division, Naval Research Laboratory, 4555 Overlook Avenue SW,  
Washington, D.C., USA 20375

<sup>5</sup>University of Milan, Department of Physics, via Celoria 16, 20133 Milano, Italy

\*Corresponding author: [ginzbur7@msu.edu](mailto:ginzbur7@msu.edu)

# 1. Plots of the $\alpha$ - and SAP relaxation times for various polymers

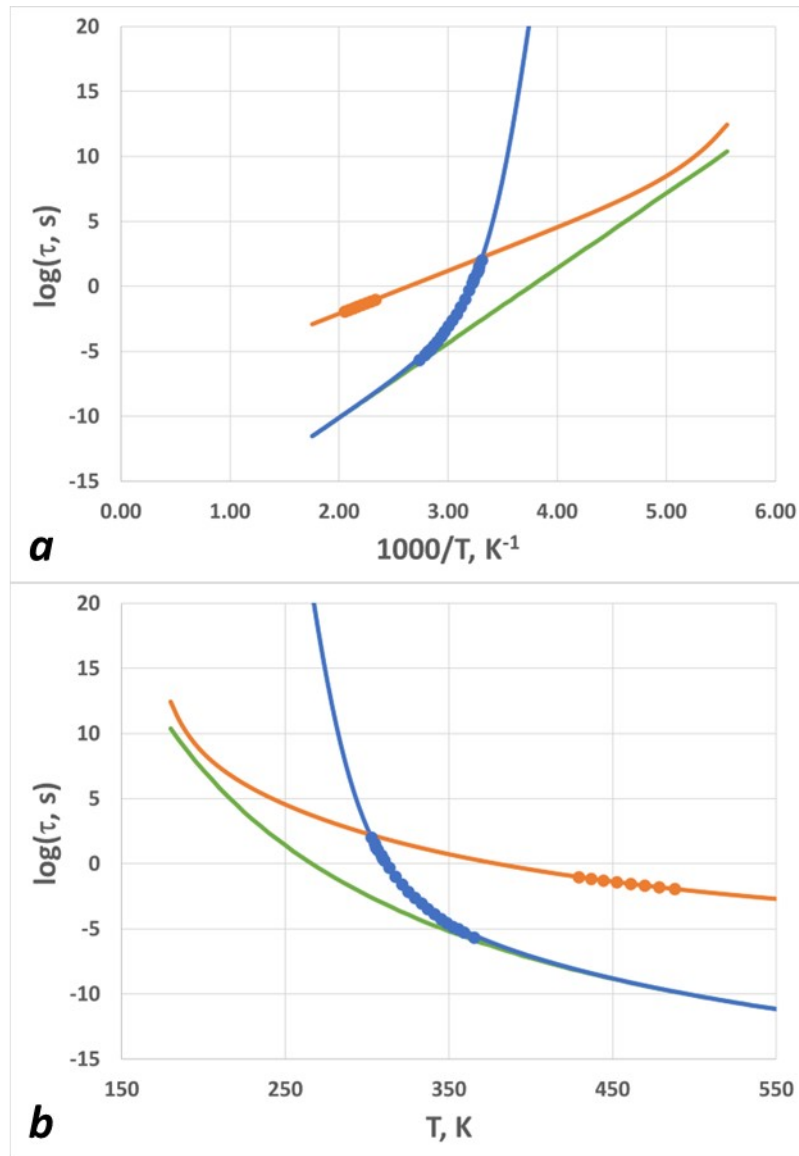

Figure S 1. Experimental data (circles) and TS2 model fits for PVAc. (a) Arrhenius plot; (b) standard temperature-relaxation time plot. Orange circles are the data for SAP relaxation times, and blue circles are the data for the  $\alpha$ -relaxation times. Orange line is the TS2 model for SAP, blue line is the TS2 model for the  $\alpha$ -process, and green line is the SAP model for the JG  $\beta$ -process.

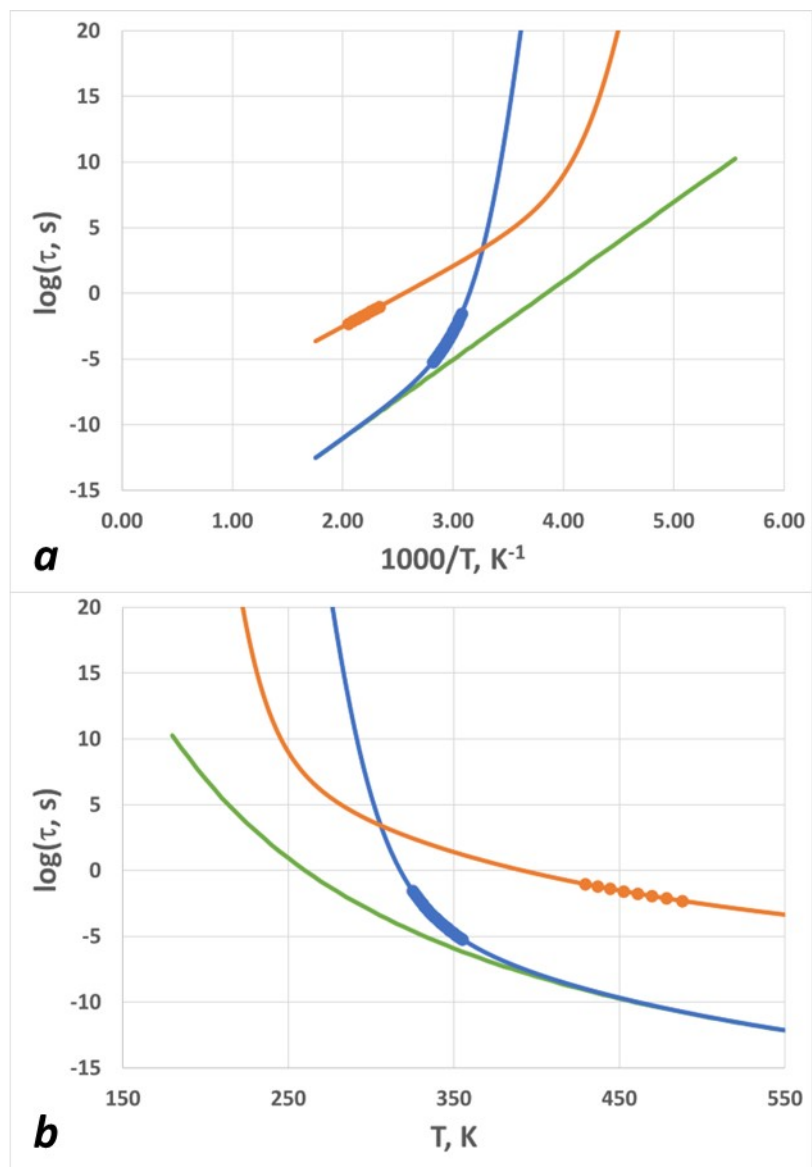

Figure S 2. Same as Figure S1, but for PTBuA.

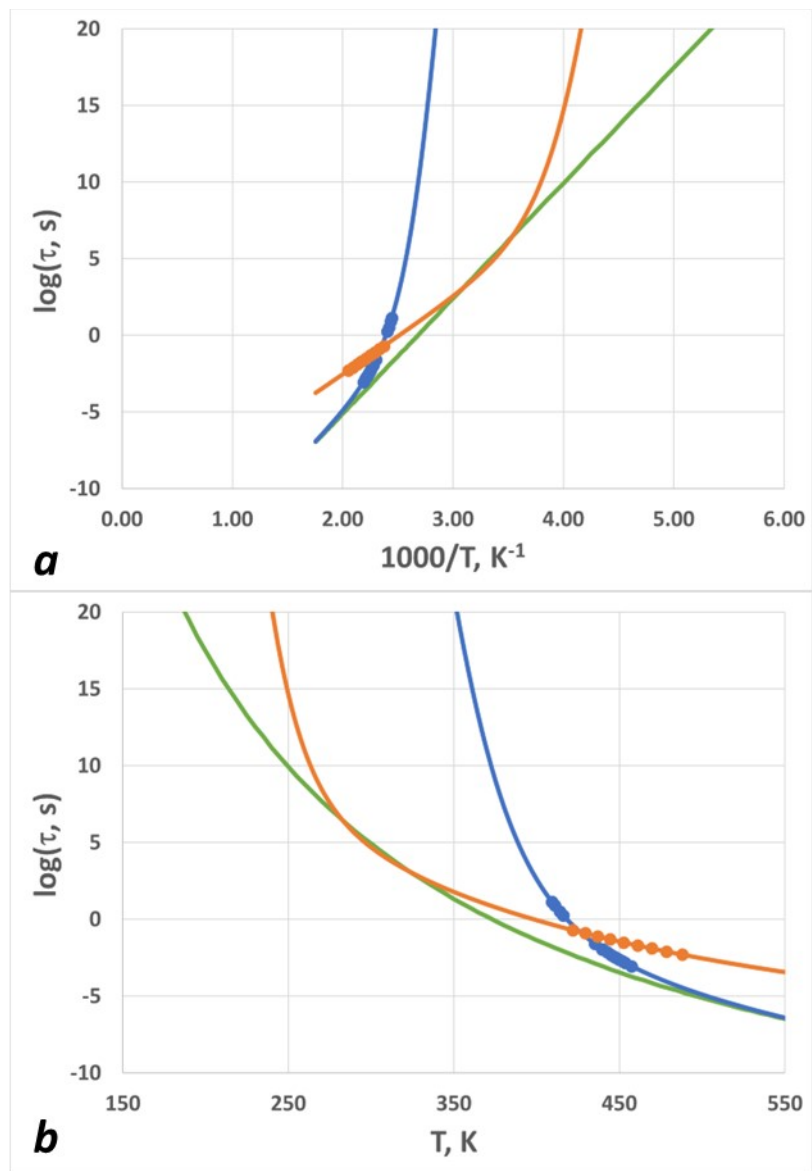

Figure S 3. Same as Figure S1, but for PTBS.

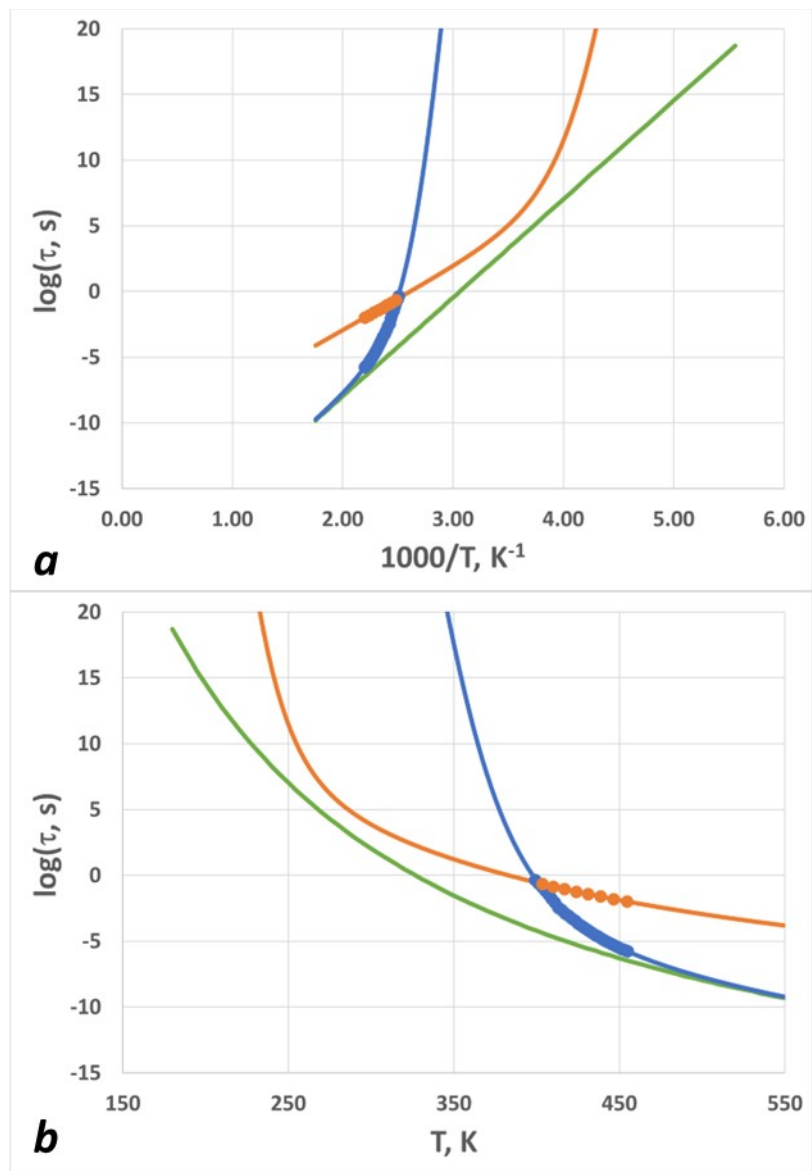

Figure S 4. Same as Figure S1, but for PTBMA.

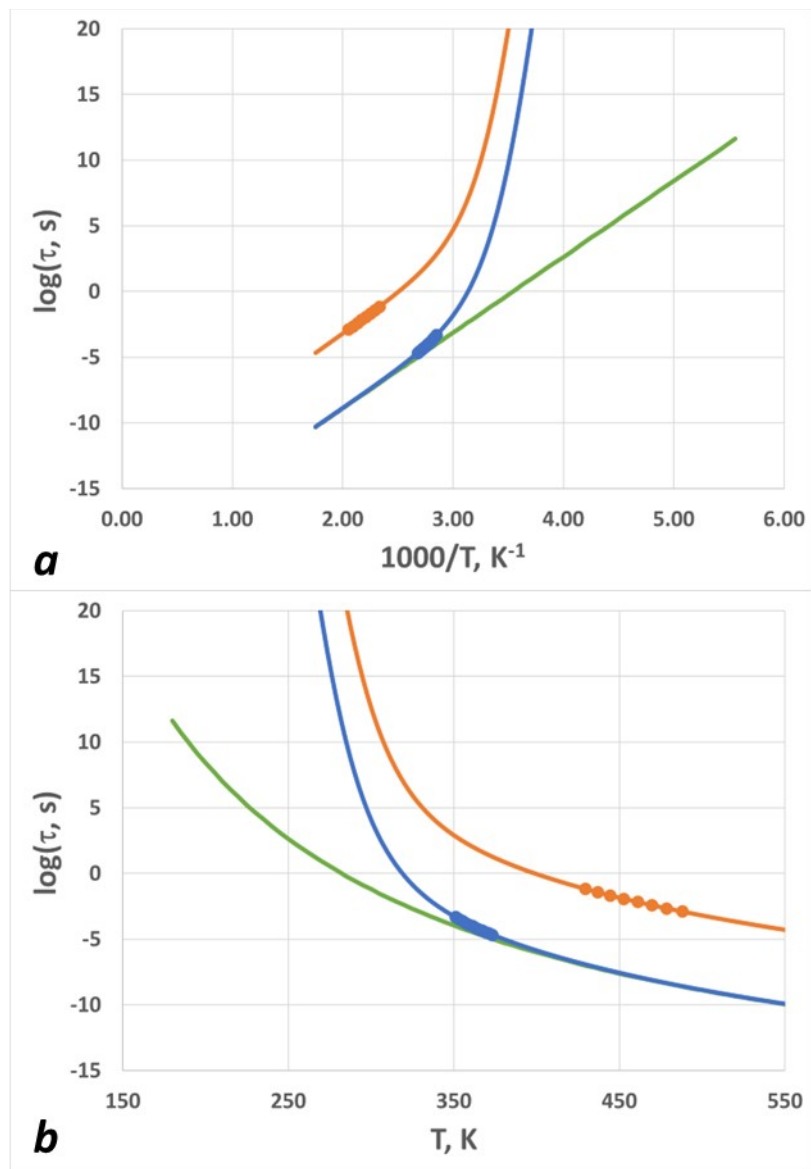

Figure S 5. Same as Figure S1, but for PNPMA.

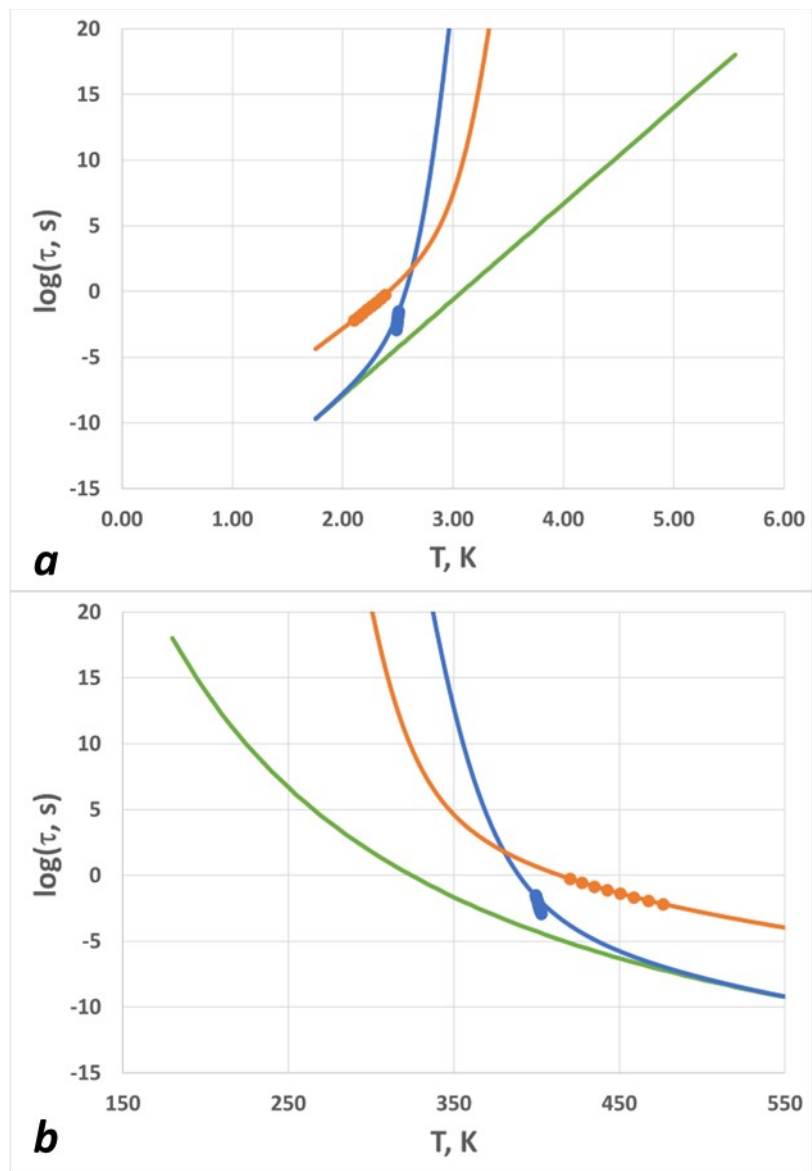

Figure S 6. Same as Figure S1, but for PMMA.

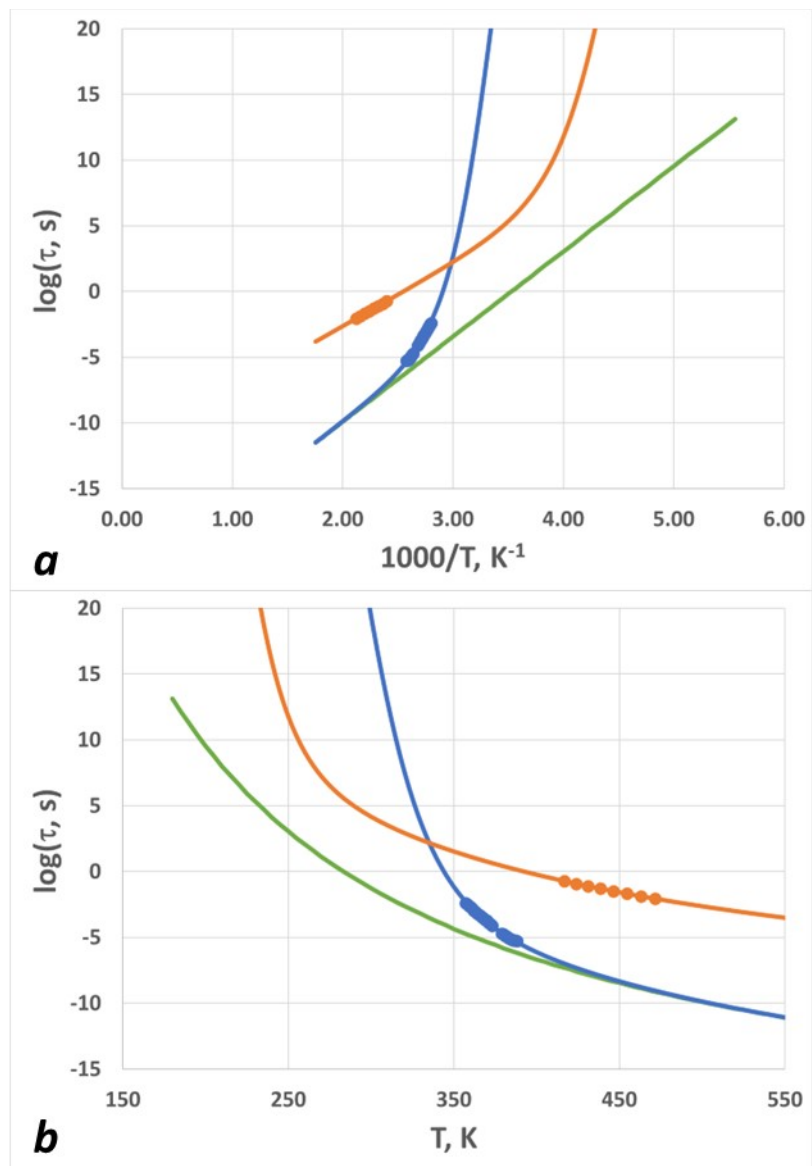

Figure S 7. Same as Figure S1, but for PEMA.

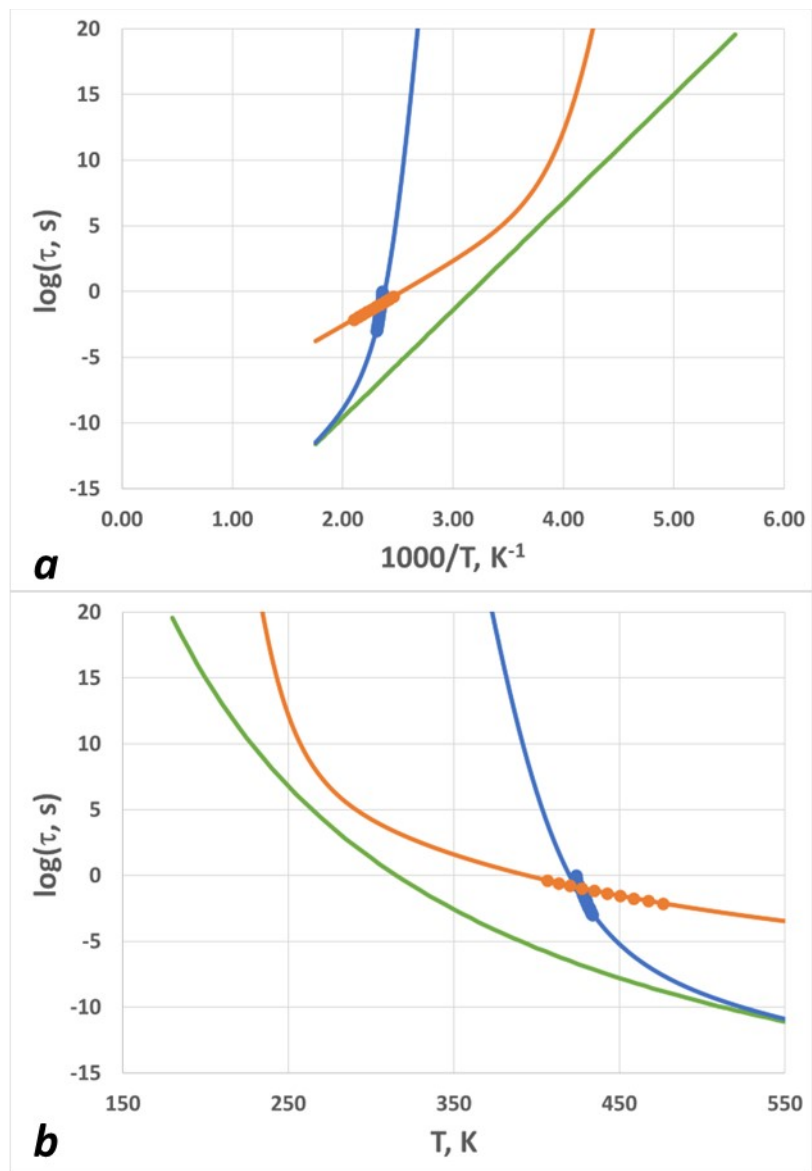

Figure S 8. Same as Figure S1, but for PC.

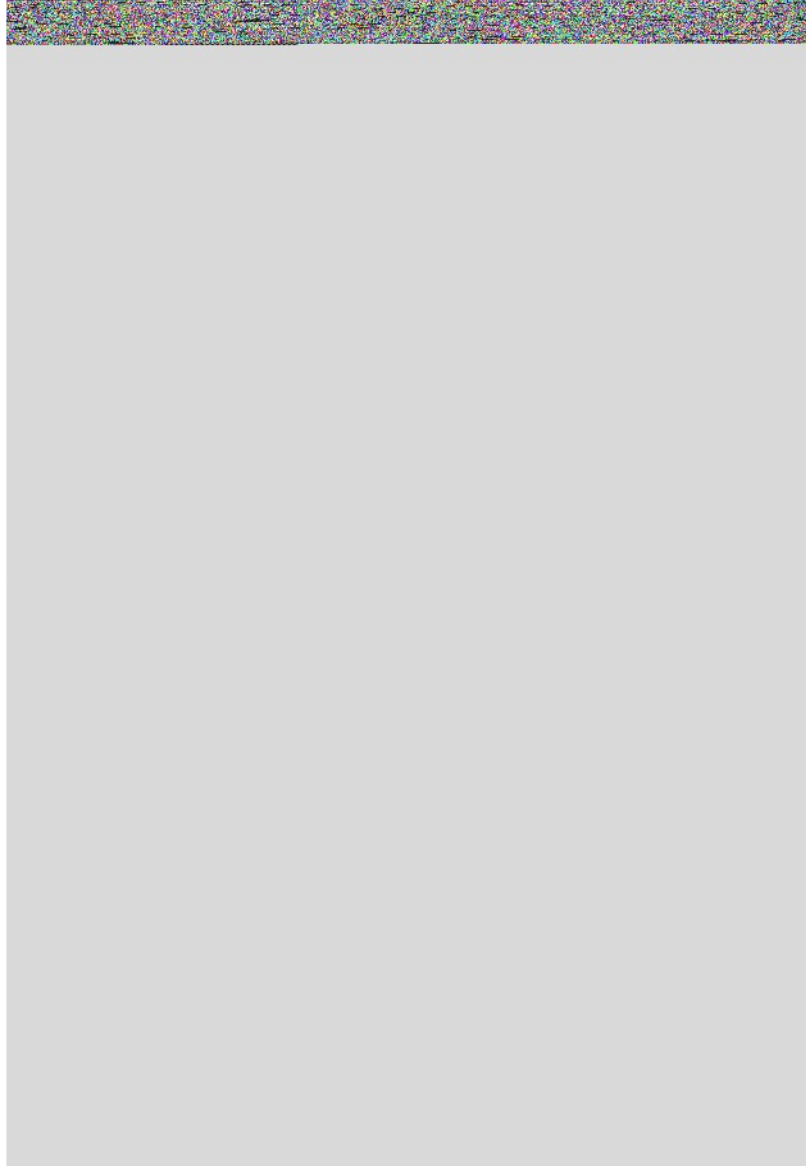

*Figure S 9. Same as Figure S1, but for PBzMA.*

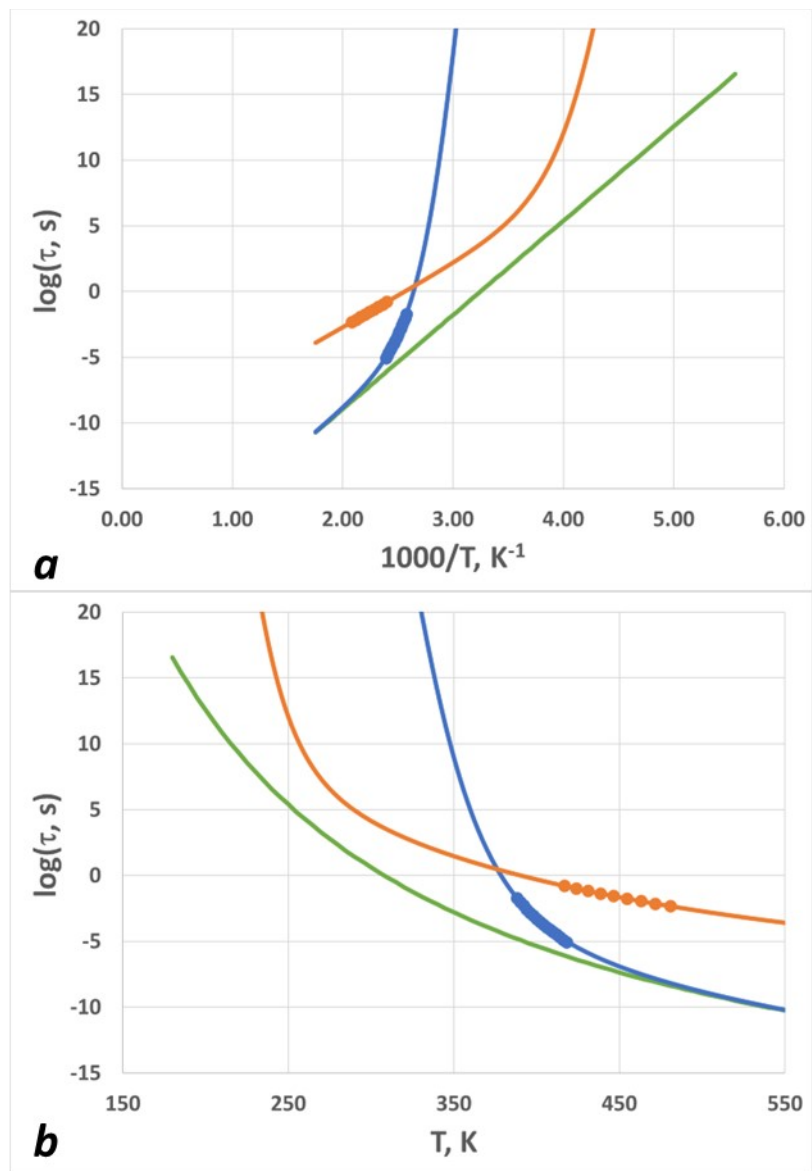

Figure S 10. Same as Figure S1, but for P4MS.

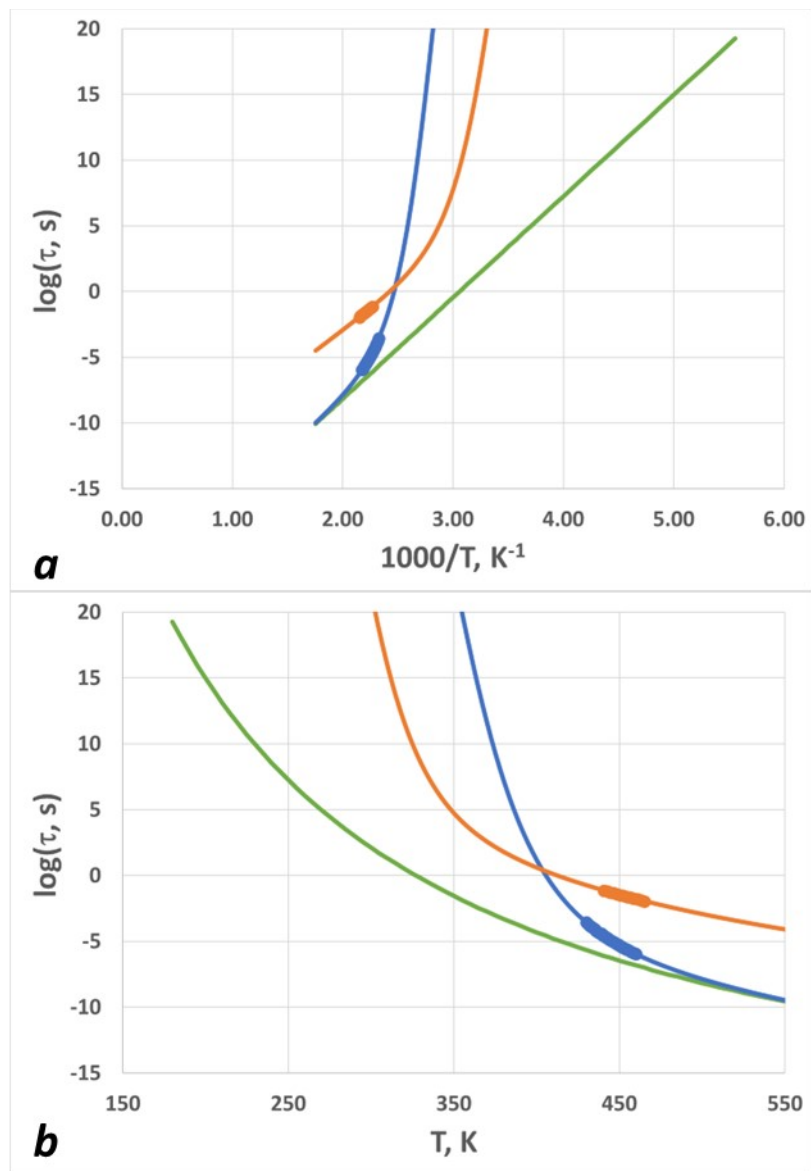

Figure S 11. Same as Figure S1, but for P4ClS.

## 2. Table of the $\alpha$ - and SAP activation energies for various polymers

Table S 1. Activation energies of the  $\alpha$ -process and the SAP.

| Polymer | $\alpha$ -process | SAP            |
|---------|-------------------|----------------|
|         | $E_1$ , kJ/mol    | $E_1$ , kJ/mol |
| P4CIS   | 148               | 121            |
| P4MS    | 137               | 92             |
| PBzMA   | 121               | 87             |
| PC      | 157               | 92             |
| PEMA    | 124               | 91.6           |
| PMMA    | 139               | 120            |
| PNPMA   | 110               | 114            |
| PS      | 137               | 90.4           |
| PTBMA   | 143               | 91.6           |
| PTBS    | 144               | 94.4           |
| PTBuA   | 115               | 87             |
| PVAc    | 110               | 63.2           |
| PIB     | 66                | 82             |
